# Supplementary material for: Mitochondrial ATP synthase as a direct molecular target of chromium(III) to ameliorate hyperglycaemia stress
Source: Springer Nature journal article supplement (doi:10.1038/s41467-023-37351-w), 2023-03-28
Supplement: MOESM1 [file 41467_2023_37351_MOESM1_ESM.pdf]

## SUPPLEMENTARY INFORMATION

### **Mitochondrial ATP synthase as a direct molecular target of chromium(III) to ameliorate hyperglycaemia stress**

Haibo Wang,<sup>1†</sup> Ligang Hu,<sup>1,2†</sup> Hongyan Li,<sup>1†</sup> Yau-Tsz Lai,<sup>1</sup> Xueying Wei,<sup>1</sup> Xiaohan Xu,<sup>1</sup> Zhenkun Cao,<sup>1</sup> Huiming Cao,<sup>3</sup> Qianya Wan,<sup>4</sup> Yuen-Yan Chang,<sup>1</sup> Aimin Xu,<sup>5</sup> Qunfang Zhou,<sup>2</sup> Guibin Jiang,<sup>2</sup> Ming-Liang He,<sup>4</sup> and Hongzhe Sun<sup>1\*</sup>

<sup>1</sup>Department of Chemistry, State Key Laboratory of Synthetic Chemistry, CAS-HKU Joint Laboratory of Metallomics on Health and Environment, The University of Hong Kong, Hong Kong S.A.R., P. R. China.

<sup>2</sup>State Key Laboratory of Environmental Chemistry and Ecotoxicology, Research Center for Eco-Environmental Sciences, Chinese Academy of Sciences, Beijing, P.R. China.

<sup>3</sup>Institute of Environment and Health, Jiangnan University, Wuhan 430056, P.R. China.

<sup>4</sup>Department of Biomedical Science, City University of Hong Kong, Hong Kong, P.R. China.

<sup>5</sup>Department of Pharmacology and Pharmacy, and State Key Laboratory of Pharmaceutical Biotechnology, The University of Hong Kong, 21 Sassoon Road, Hong Kong, P.R. China.

†These authors contributed equally to this work.

\*Correspondence and request materials should be addressed to H.S. (E-mail: [hsun@hku.hk](mailto:hsun@hku.hk)).

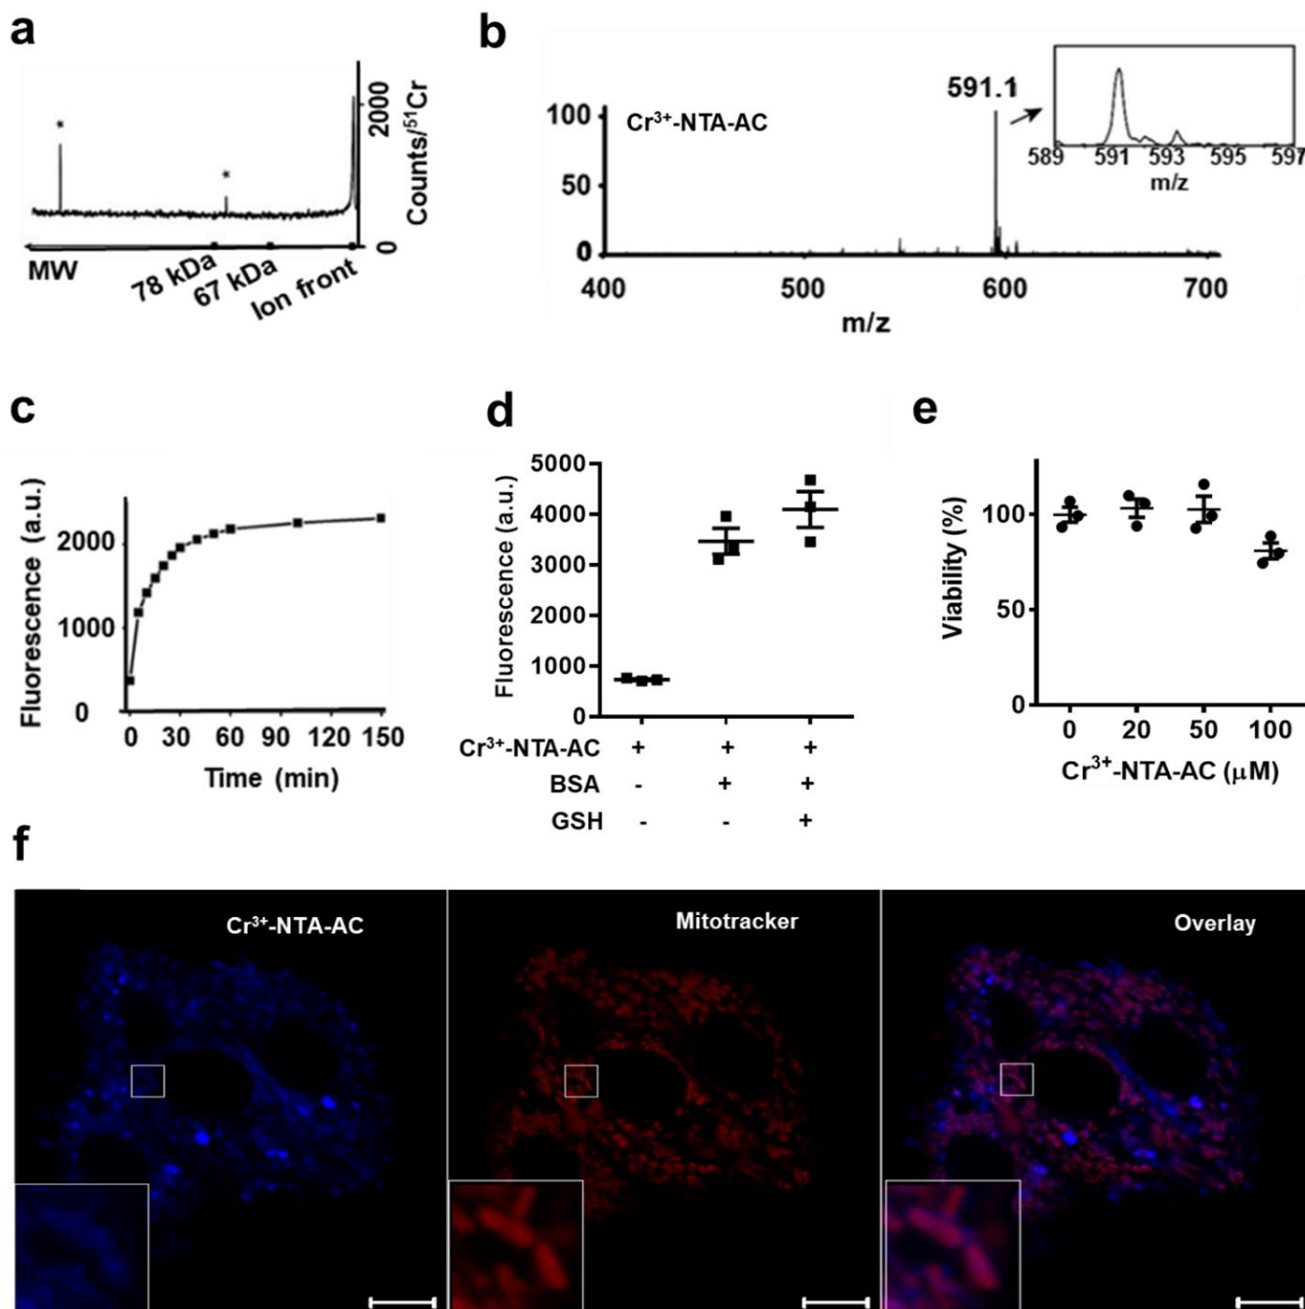

**Supplementary Fig. 1** | Visualizing the distribution of  $\text{Cr}^{3+}$  via fluorescent labeling. **(a)** Representative profile of  $\text{Cr}^{3+}$ -binding proteins in the lysate of  $\text{Cr}^{3+}$  ( $\text{CrCl}_3$ ) treated HepG2 measured by ICP-MS coupled with column-type gel electrophoresis under native condition ( $n = 5$ ). The asterisks are ghost peaks resulted from fluctuation of the instrument, which often occurs as noises during the ICP-MS analysis. **(b)** MS confirms the formation of  $\text{Cr}^{3+}$ -NTA-AC. The peak at 591.1 corresponding to  $[\text{M}-2\text{H}-\text{K}]^+$  (calcd.  $m/z$  590.3). The  $\text{Cr}^{3+}$ -NTA-AC was synthesized by reacting equimolar amounts of fluorescent ligand with  $\text{Cr}^{3+}$  (as  $\text{CrCl}_3$ ) in buffered aqueous solution. **(c)** Time-dependent fluorescence response of  $\text{Cr}^{3+}$ -NTA-AC (5  $\mu\text{M}$ ) upon incubation with bovine serum albumin (BSA, 50  $\mu\text{M}$ ). A.u. denotes arbitrary unit. The fluorescence increased rapidly to  $\sim 4$  times in 30 min and reached a plateau in 1 hr with  $\sim 5$ -fold enhancement, demonstrating that  $\text{Cr}^{3+}$ -NTA-AC can rapidly label the  $\text{Cr}^{3+}$  associated proteins. **(d)** Fluorescence "turn-on" of  $\text{Cr}^{3+}$ -NTA-AC (1  $\mu\text{M}$ ) was initiated by *ca.* 5 folds upon binding to bovine serum albumin (BSA) (1  $\mu\text{M}$ ).  $n = 3$ ; mean  $\pm$  SEM. The fluorescence response would not be deviated under physiological level of GSH (5.6 mM). BSA was selected to validate the feasibility of  $\text{Cr}^{3+}$ -NTA-AC to label proteins. **(e)** Cytotoxicity test on  $\text{Cr}^{3+}$ -NTA-AC. Negligible cytotoxicity of  $\text{Cr}^{3+}$ -NTA-AC at concentration up to 50  $\mu\text{M}$  was noted.  $n = 3$ ; mean  $\pm$  SEM. **(f)** Representative confocal microscopic imaging of live HepG2 cells labeled with 50  $\mu\text{M}$   $\text{Cr}^{3+}$ -NTA-AC and Mitotracker<sup>®</sup> red ( $n = 5$ ) under normal glucose (5.6 mM) condition. Co-localization of the fluorescence of  $\text{Cr}^{3+}$ -NTA-AC (blue) and Mitotracker<sup>®</sup> red was observed (pink), indicating that  $\text{Cr}^{3+}$ -associated proteins are localized in mitochondria. Scale bars: 10  $\mu\text{m}$ . Source data are provided as a Source Data file.

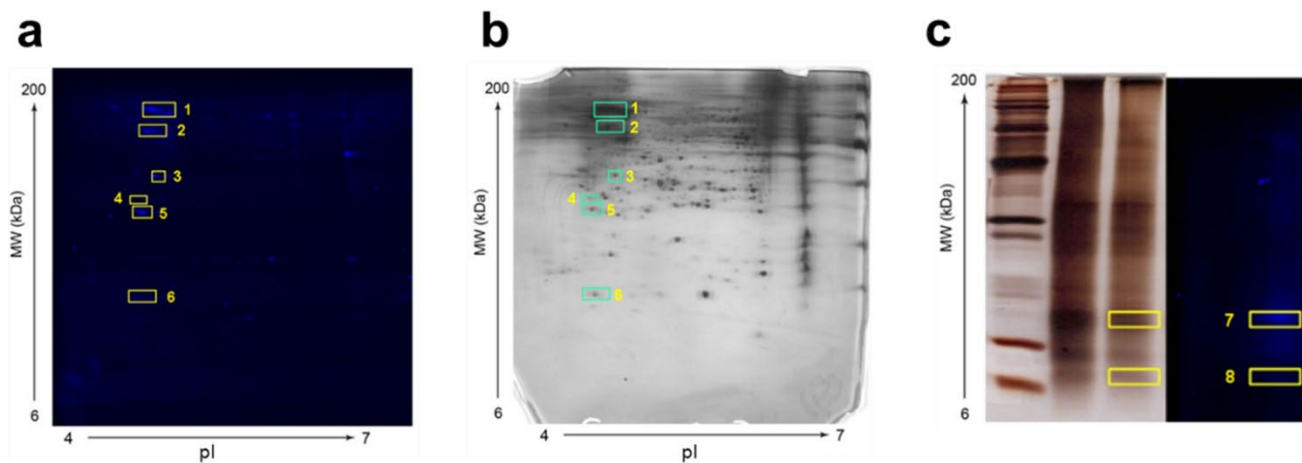

**Supplementary Fig. 2** | Separation and identification of  $\text{Cr}^{3+}$ -associated proteins by gel electrophoresis. (a, b) Two-dimensional electrophoresis (2-DE) of soluble protein fraction of HepG2 cells treated with 50  $\mu\text{M}$   $\text{Cr}^{3+}$ -NTA-AC. Fluorescent (a) and silver stained (b) images of 2-DE. (c) SDS-PAGE gel separation of insoluble fraction of HepG2 cells. The lit-up protein spots and bands are highlighted in boxes. The spots were excised and subjected to protein identification by MALDI-TOF-MS. In both 1D SDS-PAGE and 2-DE study, the fluorescent images were overlapped with the silver-stained images to confirm the position of the lit-up spots and then further excising for protein identification. Fluorescent spots that could not overlap well with a protein spot by silver-staining were not submitted for protein identification. Given the high sensitivity of fluorescence labeling, it could be possible that the quantity of protein identified was not sufficient to give positive signals by silver staining, or capable of submitting for MS identification after excising from the gel. One representative result of three independent experiments is shown (a, b, c). Source data are presented in the figure.

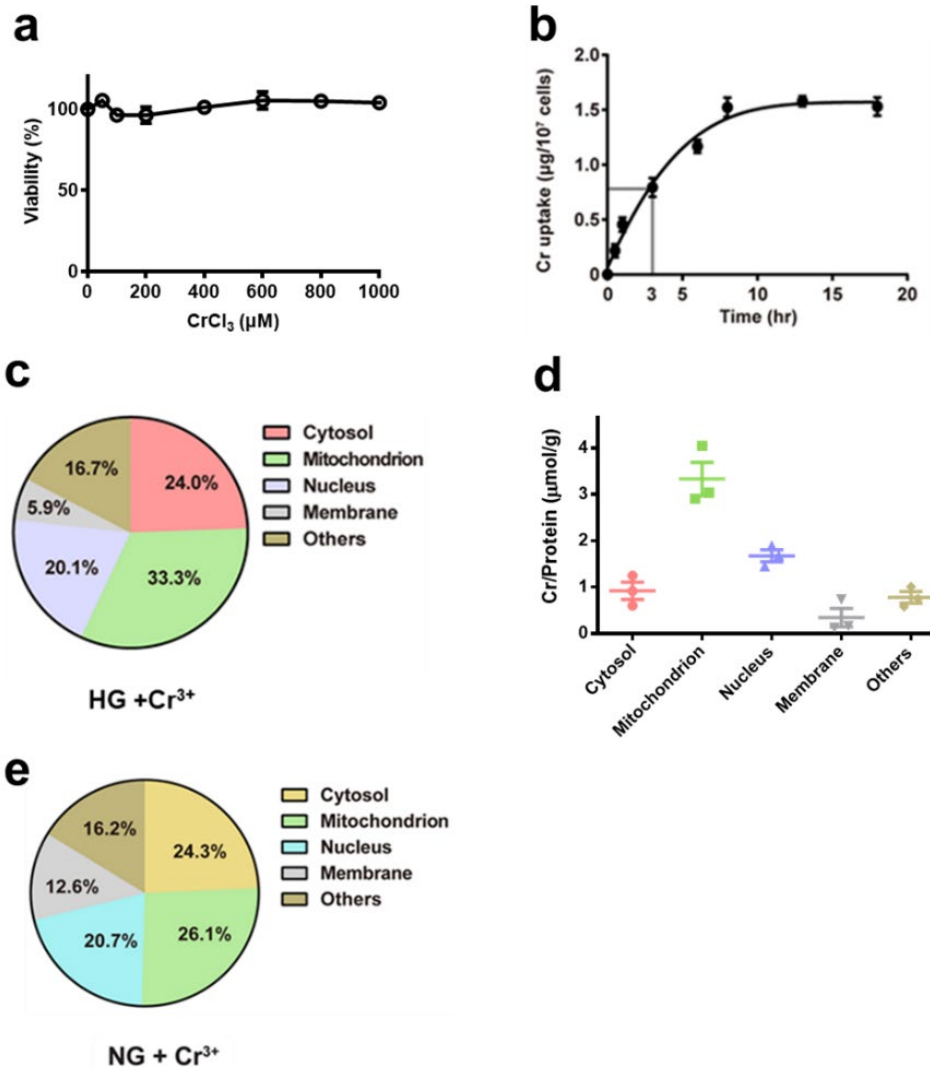

**Supplementary Fig. 3** | Chromium(III) cellular uptake and distribution. **(a)** Cytotoxicity test of CrCl<sub>3</sub>. n = 3; mean ± SEM. Negligible cytotoxicity of CrCl<sub>3</sub> at concentration up to 1000 μM was noted. **(b)** Time-dependent uptake of Cr<sup>3+</sup> in HepG2 cells after treatment with 100 μM CrCl<sub>3</sub>. n = 3; mean ± SEM. Cr<sup>3+</sup> distribution in different components of HepG2 cells treated with 100 μM CrCl<sub>3</sub> for 8 hrs under hyperglycaemia **(c)** and normal glucose condition **(e)**. **(d)** Cr<sup>3+</sup> to protein ratio in different cellular components of HepG2 cells. n = 3; mean ± SEM. Source data are provided as a Source Data file.

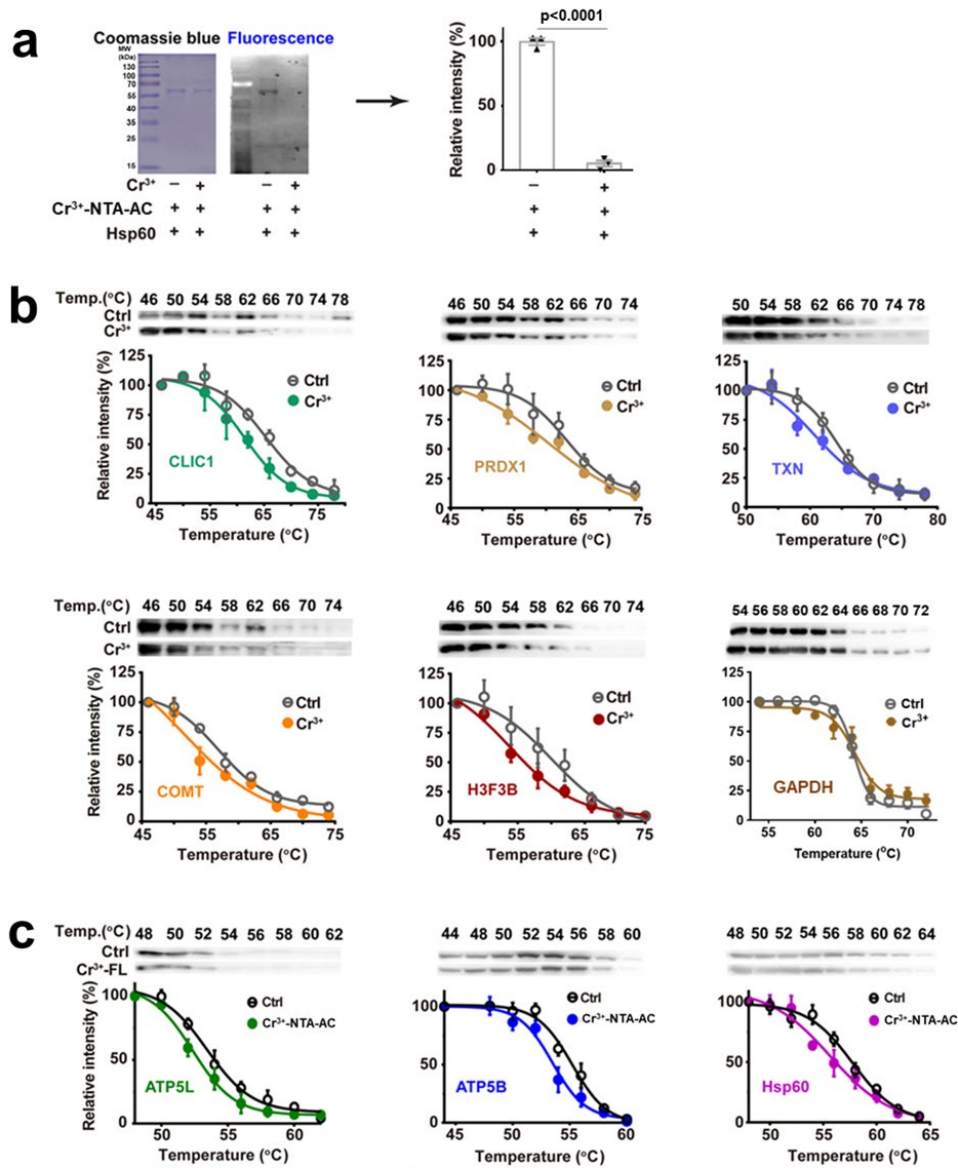

**Supplementary Fig. 4** | Validation of binding of  $CrCl_3$  or  $Cr^{3+}$ -NTA-AC to the identified proteins. (a) SDS-PAGE of Hsp60 with Coomassie Blue staining and fluorescence image.  $n = 3$ ; mean  $\pm$  SEM. Two-sided Student's  $t$  test. (b) Cellular thermal-shift assays (CETSA) demonstrated that  $Cr^{3+}$  binds to CLIC1, PRDX1, TXN, COMT, and H3F3A in cellulo but not GAPDH. HepG2 cells were treated with 100  $\mu M$   $Cr^{3+}$  (as  $CrCl_3$ ) under hyperglycaemia conditions and the thermal changes of the identified  $Cr^{3+}$ -binding proteins were monitored.  $n = 3$ ; mean  $\pm$  SEM. (c) CETSA demonstrated that  $Cr^{3+}$ -NTA-AC binds to Hsp60, ATP5B and ATP5L in cellulo.  $n = 3$ ; mean  $\pm$  SEM. Similar thermal destabilization of these proteins by  $Cr^{3+}$ -NTA-AC in HepG2 cells was observed under identical conditions with three mitochondrial proteins Hsp60, ATP5B and ATP5L as showcases, indicating that  $Cr^{3+}$ -NTA-AC resembles  $CrCl_3$  for the identification of protein targets. One representative western blot result of three independent experiments is shown (a, b, and c). Source data are provided as a Source Data file.

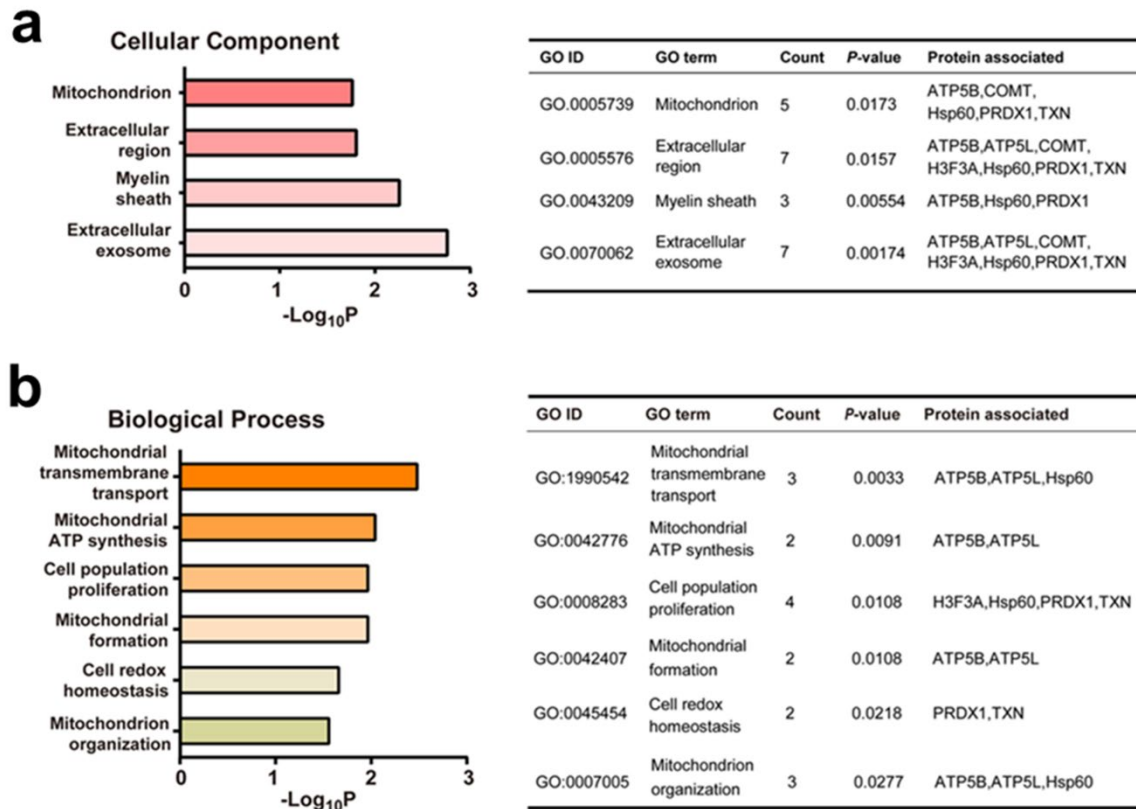

**Supplementary Fig. 5** | Bioinformatics analysis. **(a)** Gene ontology (GO) enrichment analysis on the targeted proteins demonstrates that mitochondrion is the most relevant cellular component (GO: 0005739,  $p = 1.7 \times 10^{-2}$ ), with five proteins (PRDX1, Hsp60, ATP5B, TXN, and COMT) located in the mitochondrion. **(b)** The mitochondrial ATP synthesis coupled proton transport (GO: 0042776,  $p = 9.1 \times 10^{-3}$ ) is one of the most related biological processes, with the proteins (ATP5B and ATP5L) directly related to ATP synthase process. Source data are presented in the figure.

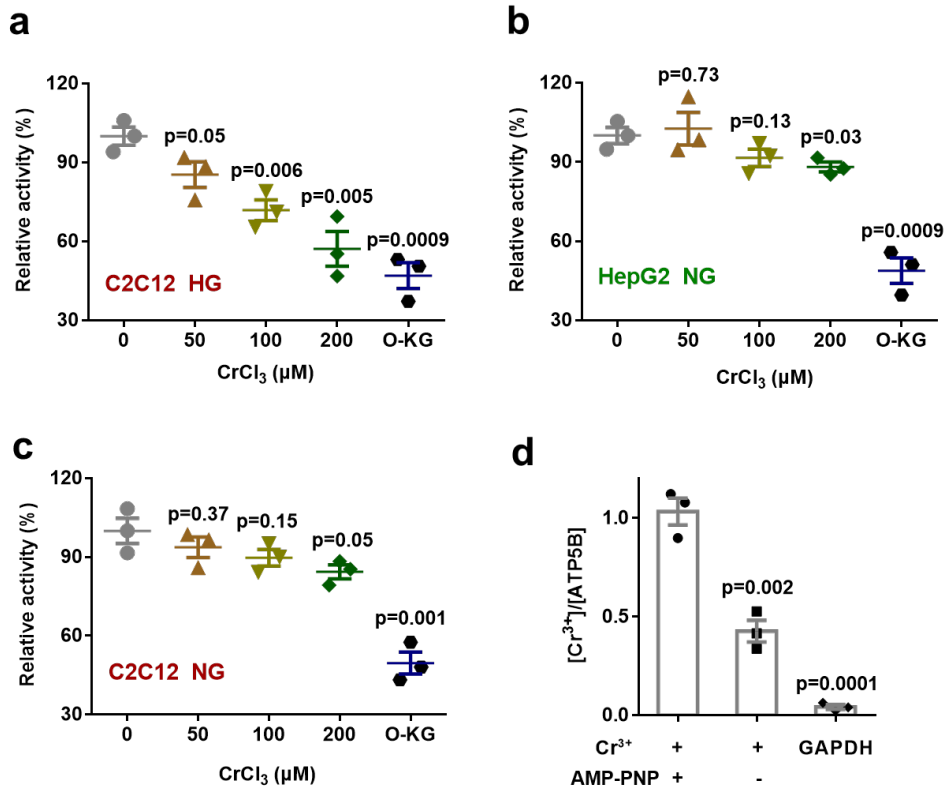

**Supplementary Fig. 6 | ATP synthase activity measurement.** (a) The effect of Cr<sup>3+</sup> on ATP synthase activity of C2C12 cells under hyperglycemia condition (HG). n = 3; mean ± SEM. Two-sided Student's *t* test. (b) The effect of Cr<sup>3+</sup> on ATP synthase activity of HepG2 cells under normal glucose condition (NG). n = 3; mean ± SEM. Two-sided Student's *t* test. (c) The effect of Cr<sup>3+</sup> on ATP synthase activity of C2C12 cells under normal glucose condition (NG). n = 3; mean ± SEM. Two-sided Student's *t* test. ATP5B inhibitor Octyl- $\alpha$ -ketoglutarate (O-KG) is used as control. (d) The effect of nucleotide on Cr<sup>3+</sup> binding to ATP5B as determined by ICP-MS. n = 3; mean ± SEM. Two-sided Student's *t* test. GAPDH is used as a control. Source data are provided as a Source Data file.

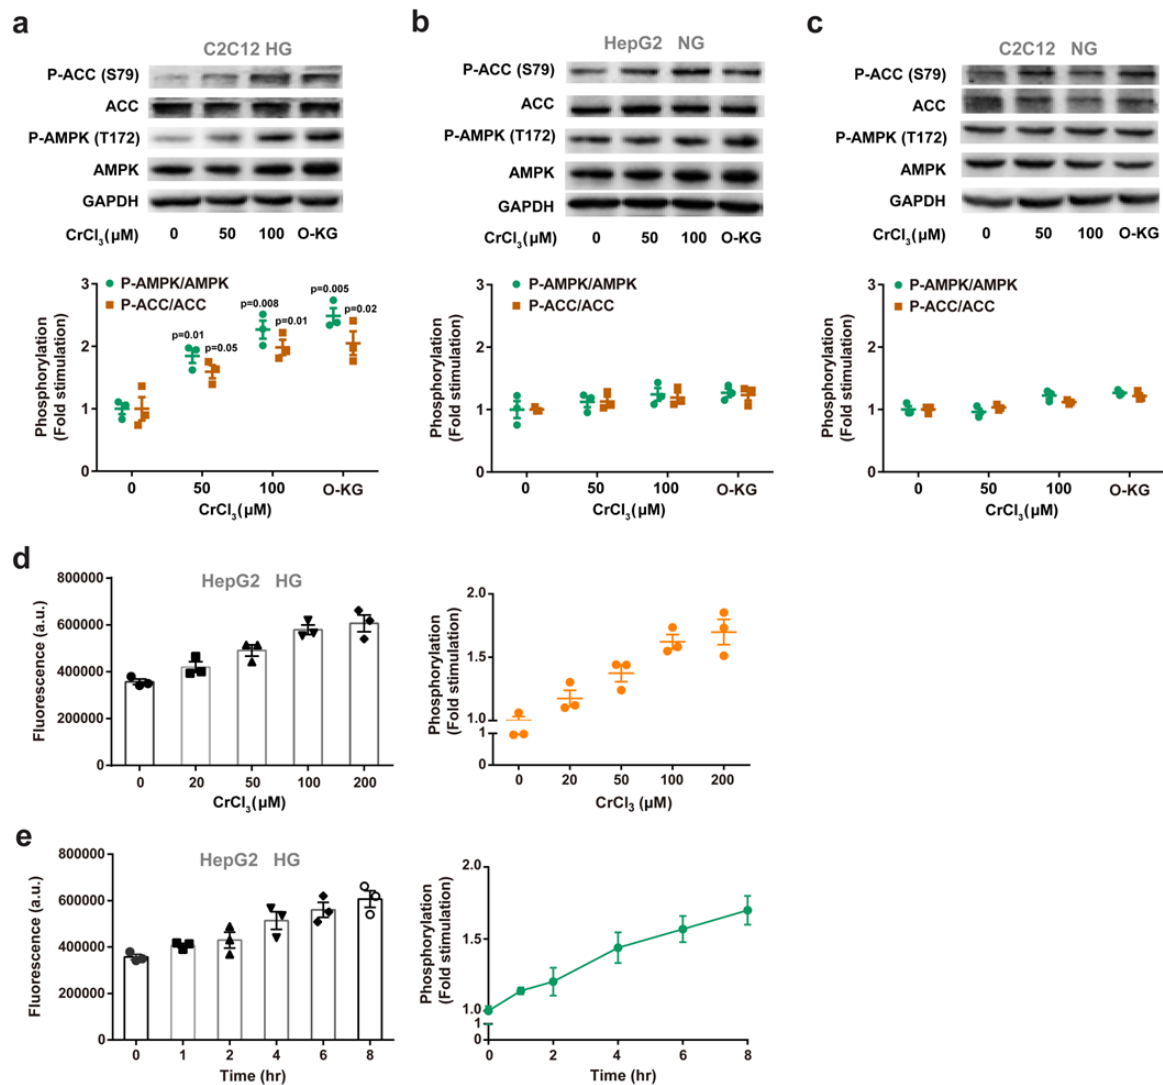

**Supplementary Fig. 7** | Cr<sup>3+</sup> activates AMPK under hyperglycaemia condition. Effect of Cr<sup>3+</sup> treatment on AMPK and ACC activation under hyperglycemia condition (**a**) C2C12 cells and normal glucose condition (**b**) C2C12 cells (**c**) HepG2 cells. n = 3; mean ± SEM. Two-sided Student's *t* test. (**d**) Dose-dependent activation of Cr<sup>3+</sup> on AMPK in HepG2 cells under hyperglycemia condition measured by AMPK activity assay kit, in which AMPK activity is represented by the contents of P-AMPK with an antibody-based fluorescence approach. n = 3; mean ± SEM. (**e**) Time-dependent activation of Cr<sup>3+</sup> on AMPK. n = 3; mean ± SEM. HG, high glucose (40 mM). NG, normal glucose (5.6 mM). One representative western blot result of three independent experiments is shown (**a**, **b**, and **c**). Source data are provided as a Source Data file.



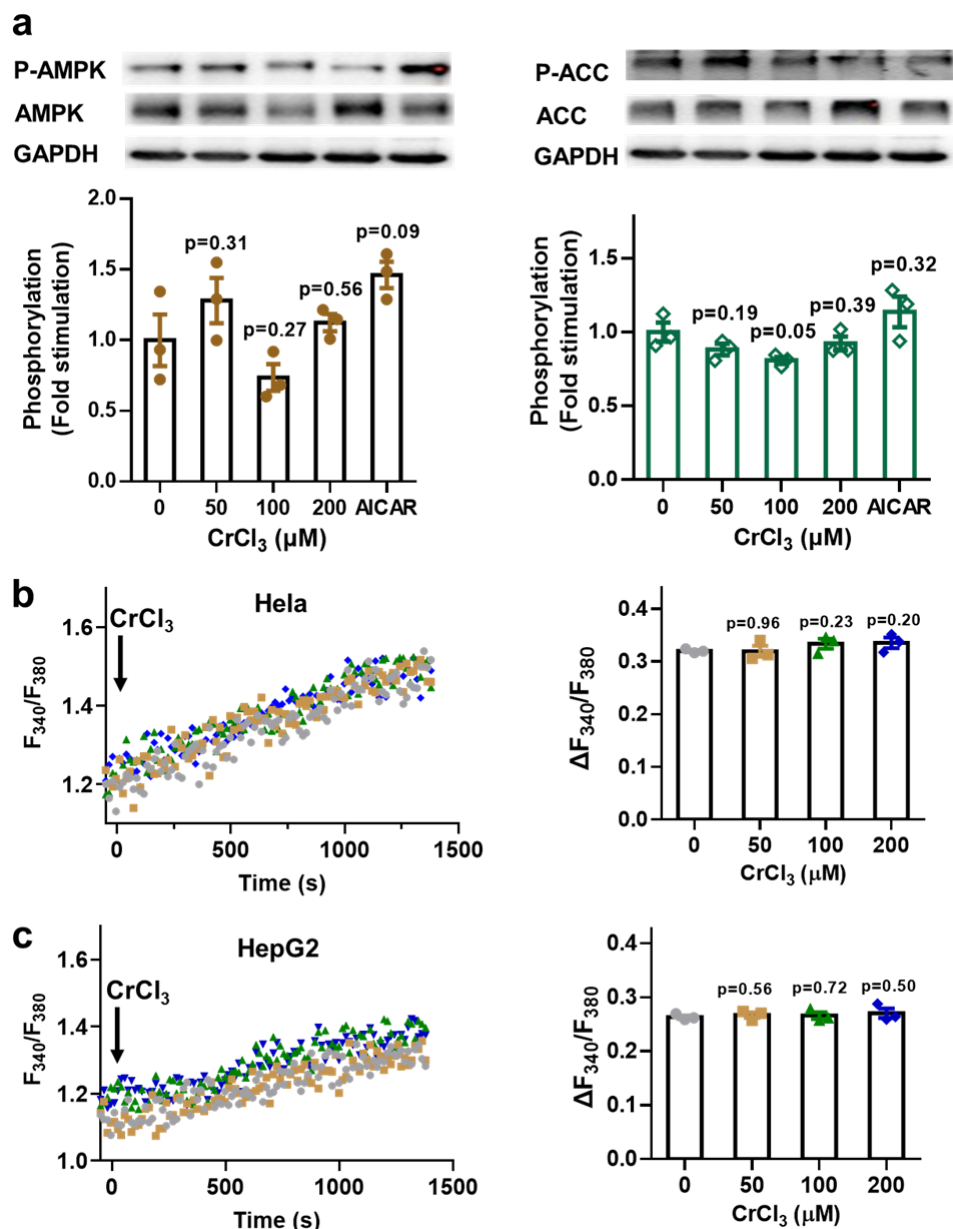

**Supplementary Fig. 8** | LKB1 is involved in  $\text{Cr}^{3+}$ -mediated activation of AMPK. **(a)** Effect of  $\text{Cr}^{3+}$  treatment on AMPK and ACC activation in Hela cells under hyperglycemia condition.  $n = 3$ ; mean  $\pm$  SEM. Two-sided Student's  $t$  test. Intracellular  $\text{Ca}^{2+}$  levels in Hela cells **(b)** and HepG2 cells **(c)** after treatment of various concentration of  $\text{CrCl}_3$ .  $n = 3$ ; mean  $\pm$  SEM. Two-sided Student's  $t$  test. One representative western blot result (a) and real time fluorescence curve (b and c) of three independent experiments is shown. Source data are provided as a Source Data file.

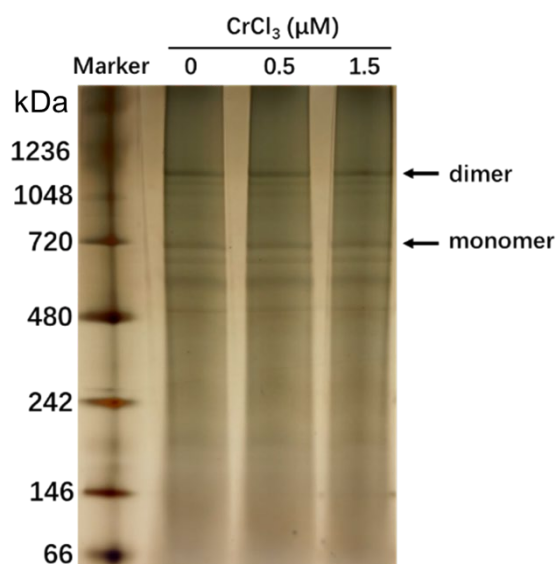

**Supplementary Fig. 9** | Effect of  $\text{Cr}^{3+}$  treatment on ATP synthase oligomerization state. Digitonin protein extracts of mitochondria isolated from HeLa cells were separated by 4-16% blue native page (BNP). One representative result of three independent experiments is shown. Source data are presented in the figure.

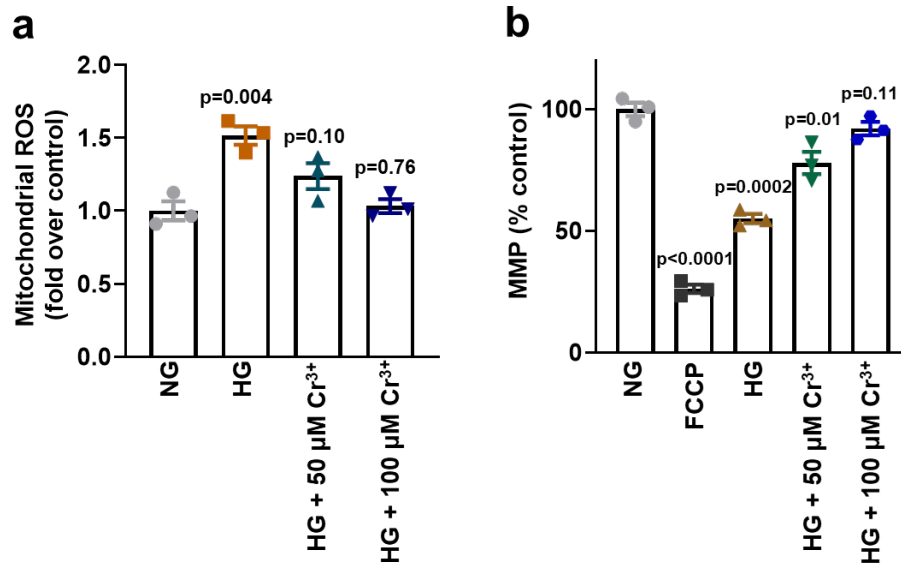

**Supplementary Fig. 10** | Effect of  $\text{CrCl}_3$  treatment on mitochondrial ROS and mitochondrial membrane potential (MMP) in HepG2 cells under high glucose (HG). **(a)** Mitochondrial ROS.  $n = 3$ ; mean  $\pm$  SEM. Two-sided Student's  $t$  test. **(b)** Mitochondrial membrane potential.  $n = 3$ ; mean  $\pm$  SEM. Two-sided Student's  $t$  test. Normal glucose (NG) is used as control. Results are shown as mean  $\pm$  SEM. Source data are provided as a Source Data file.

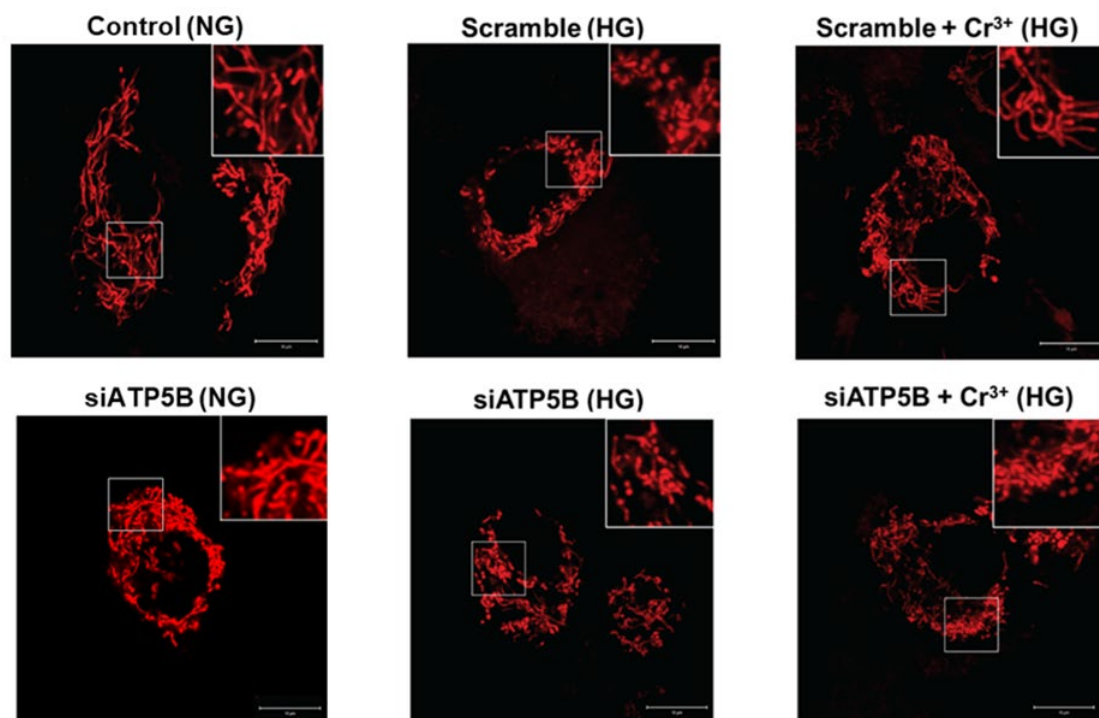

**Supplementary Fig. 11** | Cr<sup>3+</sup> rescues mitochondria from hyperglycaemia-induced fragmentation through targeting ATP5B. Microscopic imaging of wild-type (WT) HepG2 cells, HepG2 cells transfected with negative control siRNA (scramble) or ATP5B siRNA with mitochondria stained by MitoTracker<sup>®</sup> under normal glucose condition (5.6 mM) (NG), high glucose-induced stress (40 mM, HG) and high glucose-induced stress with Cr<sup>3+</sup> supplementation (100 μM) (HG + Cr<sup>3+</sup>) (n = 5). Inset: 2 times enlargement of mitochondria. Scale bars: 5 μm. Source data are presented in the figure.

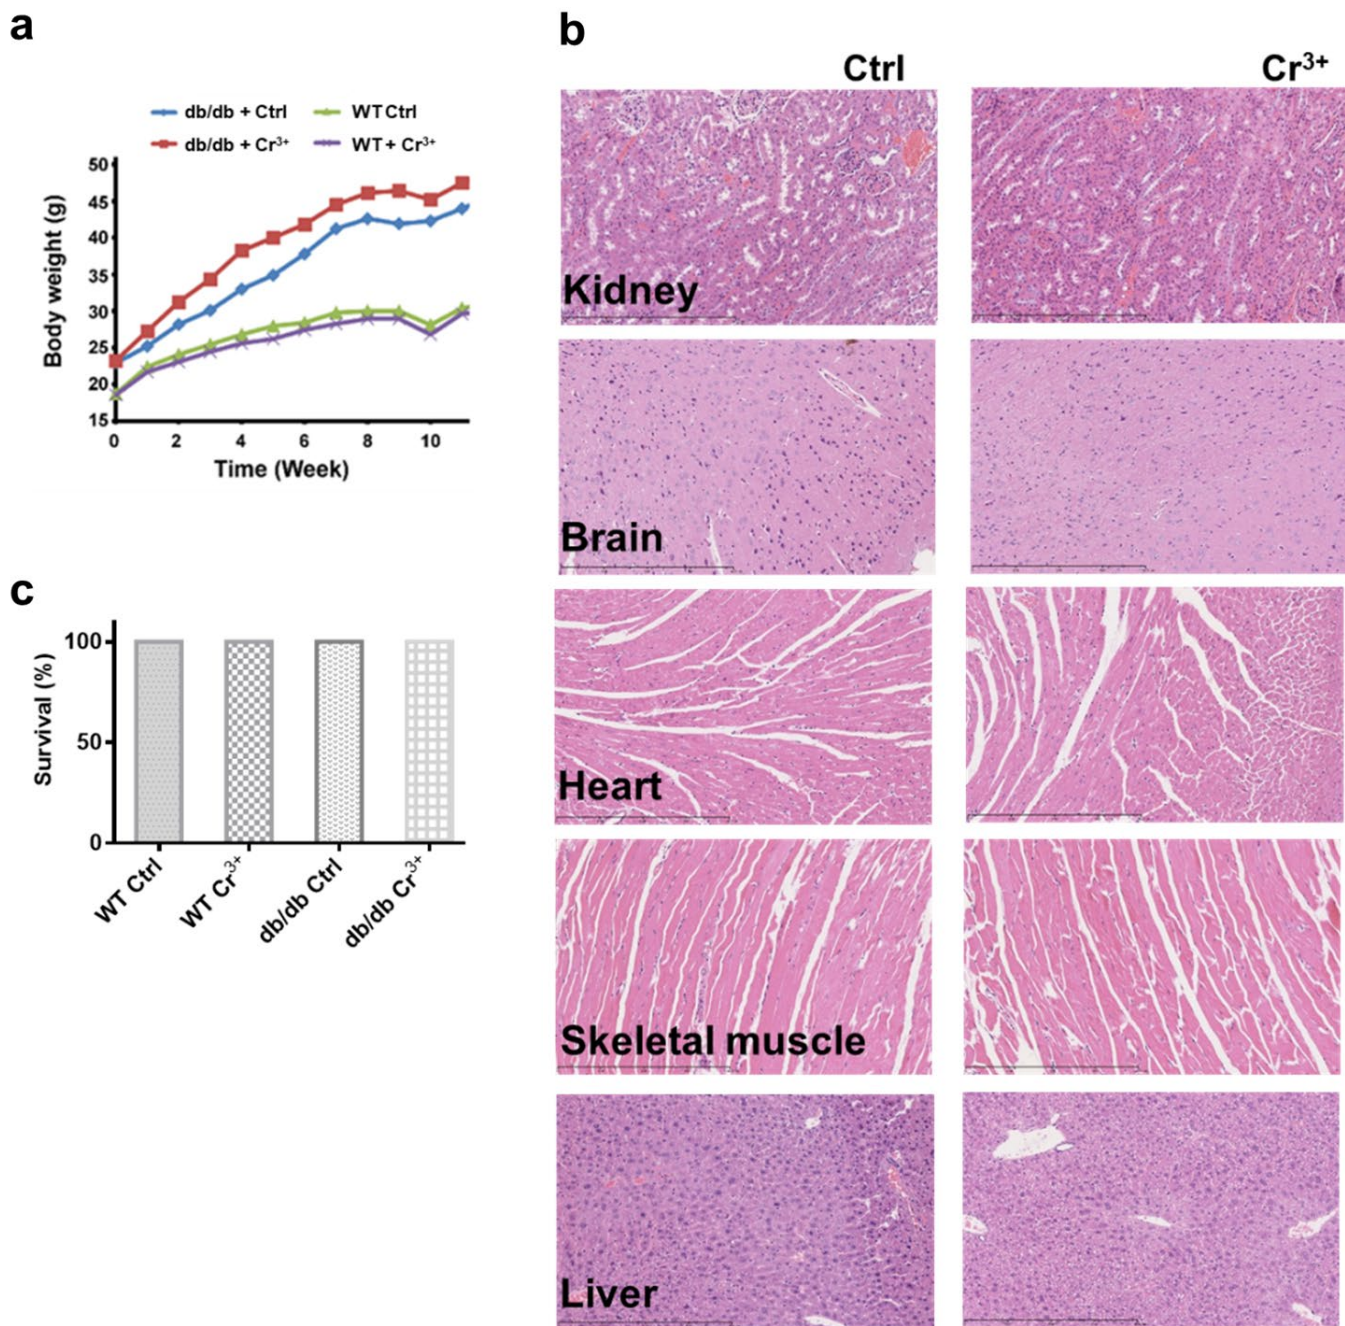

**Supplementary Fig. 12** | The body weight/viability of mice with or without treatment of Cr<sup>3+</sup>. **(a)** Body weight change of db/db and wild-type (WT) mice. Results are shown as mean (n = 6). **(b)** Survival of mice after Cr<sup>3+</sup> treatment for 10 weeks (n = 6). **(c)** Histologic examination of different organ tissues (n = 6). Hematoxylin-eosin-stained kidney, brain, heart, skeletal muscle, and liver sections from WT mice fed with either a control or Cr<sup>3+</sup> diet. One representative result of six independent animals is shown. Scale bar: 200  $\mu$ m. Source data are provided as a Source Data file.

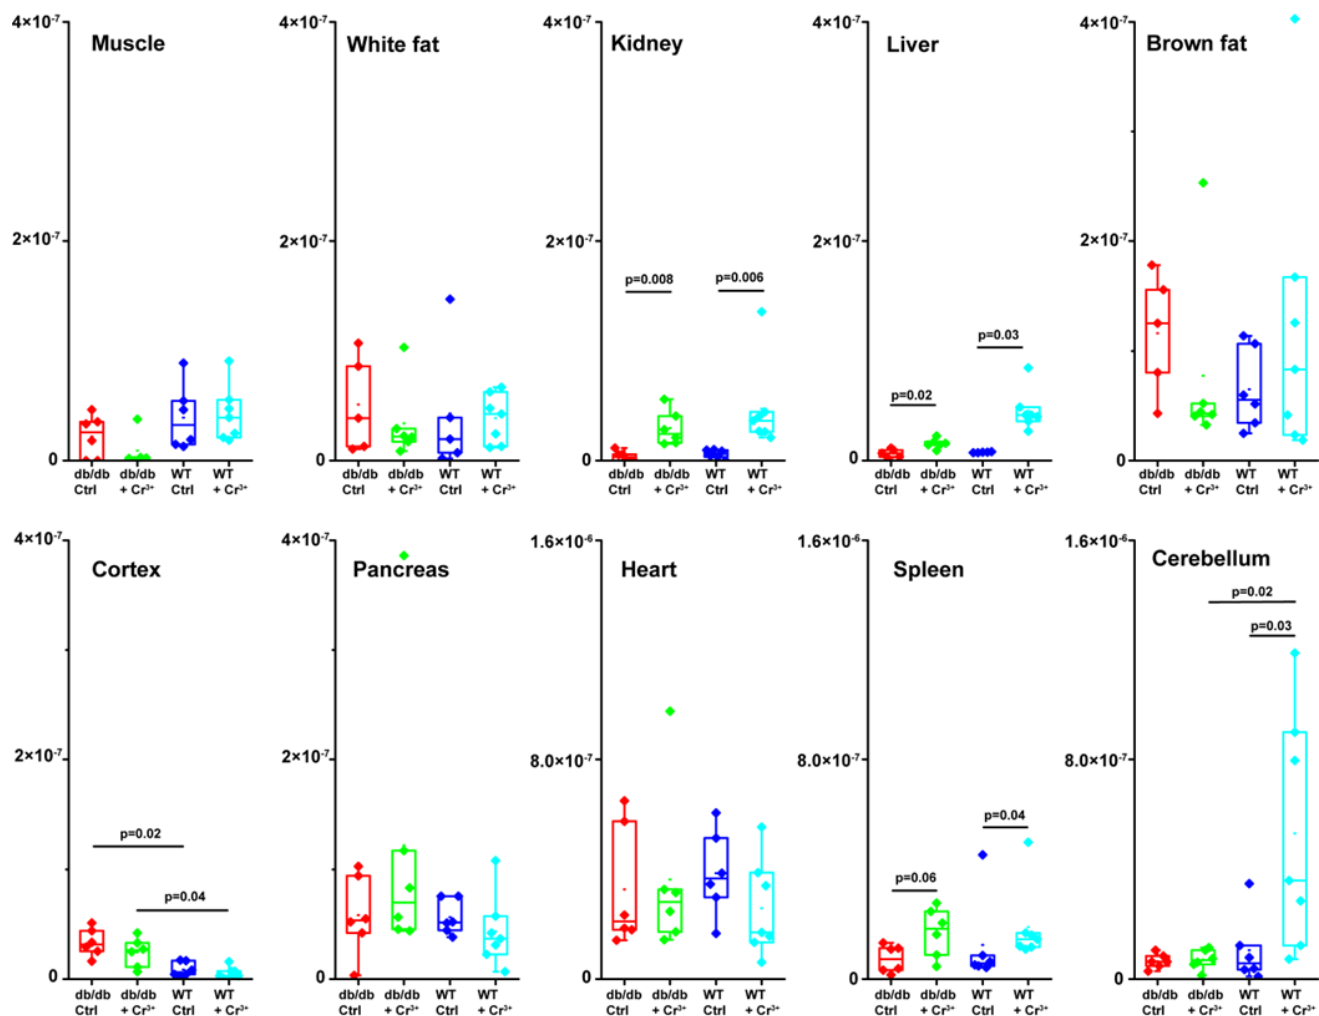

**Supplementary Fig. 13** |  $\text{Cr}^{3+}$  concentration in different organs of mice. Chromium in different organs, including muscle, white fat, kidney, liver, brown fat, cortex, pancreas, heart, spleen, and cerebellum, from mice dosed orally with chromium was quantified by ICP-MS ( $n = 6$ ). Two-tailed t-test was used for all comparisons between two groups. For box plots, center line, median; box limits, upper and lower boundary, 75% and 25% interquartile ranges respectively; whiskers, maxima and minima; points, all data points. Two-sided Student's  $t$  test. Source data are provided as a Source Data file.

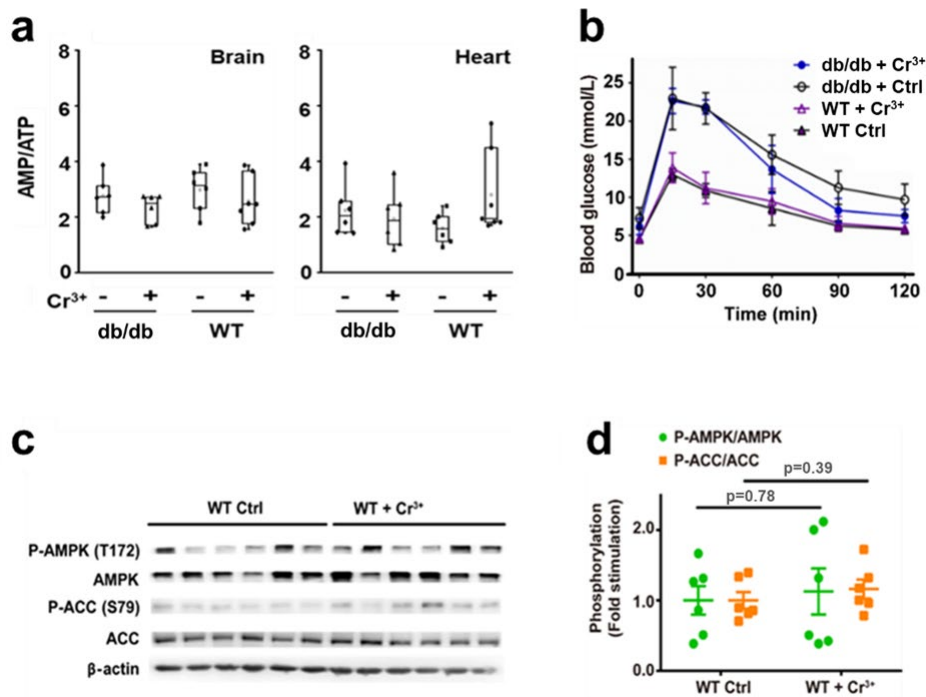

**Supplementary Fig. 14** |  $\text{Cr}^{3+}$  activates AMPK and ACC in db/db mice but not WT mice. **(a)** AMP/ATP ratios in different organs (brain and heart) of mice ( $n = 6$ ). For box plots, center line, median; box limits, upper and lower boundary, 75% and 25% interquartile ranges respectively; whiskers, max and min; points, all data points. **(b)** Oral Glucose Tolerance Test (OGTT) curve of db/db and WT mice.  $n = 6$ ; mean  $\pm$  SEM. **(c, d)** Western blot analyses of AMPK, P-AMPK, ACC, and P-ACC in the liver of WT mice with or without treatment of  $\text{Cr}^{3+}$ .  $n = 6$ ; mean  $\pm$  SEM. Two-sided Student's  $t$  test. Source data are provided as a Source Data file.



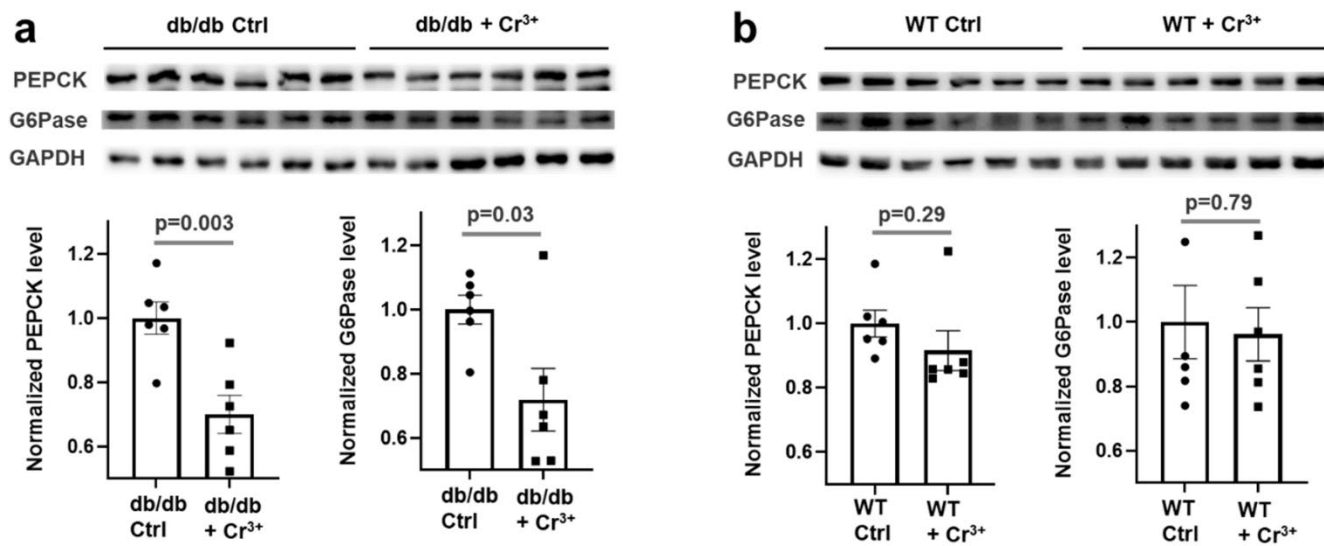

**Supplementary Fig. 15** | CrCl<sub>3</sub> suppresses hepatic gluconeogenesis in db/db mice but not normal mice. The effect of Cr<sup>3+</sup> treatment on the expression level of hepatic gluconeogenesis enzymes in db/db (**a**) and (**b**) WT mice. n = 6; mean ± SEM. Two-sided Student's *t* test. Source data are provided as a Source Data file.



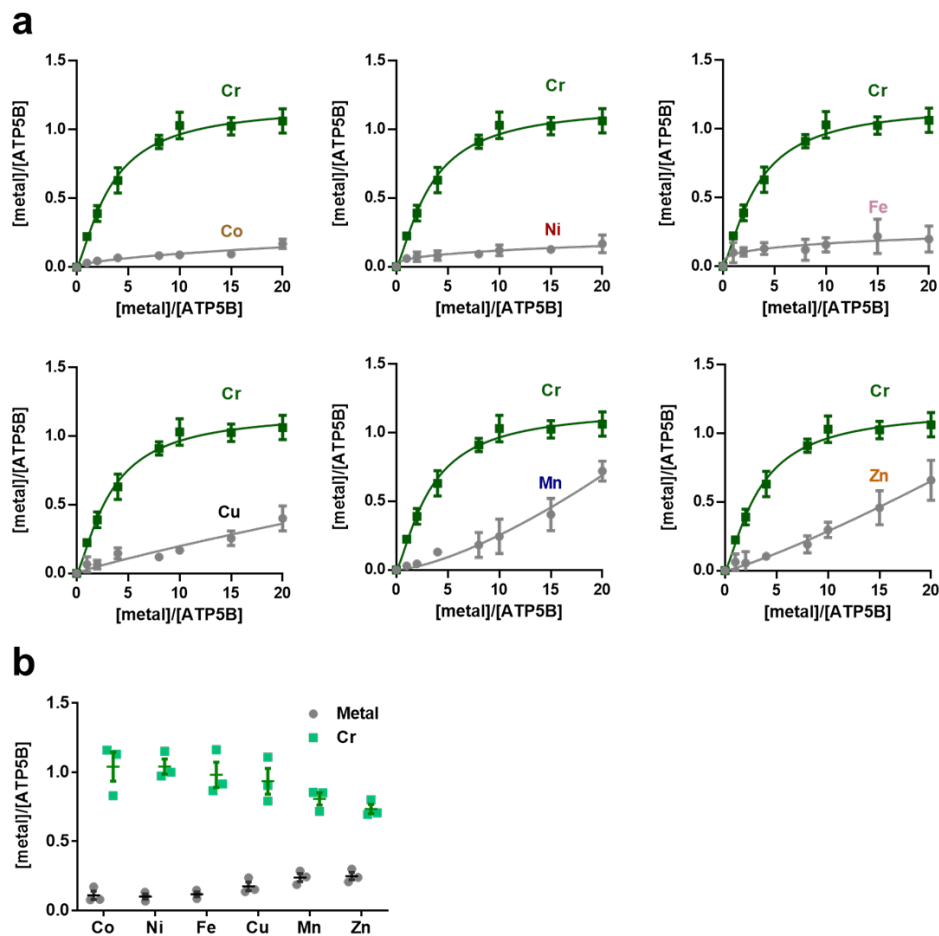

**Supplementary Fig. 16** | Binding capability of different transition metal ions to ATP5B. **(a)** Dose-dependent binding of different metal ions to ATP5B.  $n = 3$ ; mean  $\pm$  SEM. **(b)** The metal contents in Cr-ATP5B upon the supplementation of different metal ions.  $n = 3$ ; mean  $\pm$  SEM. Source data are provided as a Source Data file.

## Supplementary Tables

**Supplementary Table 1.** Summary of Cr<sup>3+</sup>-associated proteins in HepG2 tracked by Cr<sup>3+</sup>-NTA-AC in vivo.

| No. | Gene   | Gene product                                             | MW/<br>Da | Accession No. | Protein<br>Score | Total ion<br>score | Protein<br>Score<br>C.I.% | Peptide<br>count |
|-----|--------|----------------------------------------------------------|-----------|---------------|------------------|--------------------|---------------------------|------------------|
| 1   | Hsp60  | Mitochondrial heat shock<br>60 kDa protein               | 60813.3   | gi 189502784  | 378              | 270                | 100                       | 17               |
| 2   | ATP5B* | ATP synthase subunit<br>beta, mitochondrial<br>precursor | 58524.6   | gi 32189394   | 662              | 476                | 100                       | 20               |
| 3   | CLIC1  | Chloride intracellular<br>channel protein 1              | 27247.9   | gi 14251209   | 422              | 298                | 100                       | 13               |
| 4   | PRDX1  | Peroxiredoxin 1                                          | 10726.5   | gi 55959888   | 64               | 39                 | 100                       | 3                |
| 5   | COMT   | Catechol-O-<br>methyltransferase                         | 20374.4   | gi 33875419   | 360              | 278                | 100                       | 9                |
| 6   | TXN    | Thioredoxin                                              | 12014.8   | gi 50592994   | 143              | 86                 | 100                       | 6                |
| 7   | H3F3A  | H3 histone, family 3A                                    | 14157.9   | gi 55665435   | 138              | 118                | 100                       | 4                |
| 8   | ATP5L  | ATP synthase subunit g,<br>mitochondrial                 | 11421.2   | gi 51479156   | 60               | 26                 | 100                       | 4                |

\*ATP synthase is composed of two linked multi-subunit complexes, including the soluble catalytic core F<sub>1</sub> and the membrane-spanning component F<sub>0</sub>. ATP5B belongs to the soluble catalytic core F<sub>1</sub> and therefore being observed in the soluble fraction.

**Supplementary Table 2.** Peptide mass fingerprints of purified Hsp60.

| Protein Name                             |           | Accession No.     | Protein Score           | Protein Score C.I. % | Protein MW/Da | Peptide Count |
|------------------------------------------|-----------|-------------------|-------------------------|----------------------|---------------|---------------|
| 60 kDa heat shock protein, mitochondrial |           | gi 31542947       | 276                     | 100                  | 61345.5       | 15            |
| Calc. Mass                               | Obs. Mass | Peptide Seq.      | Modification            |                      | Ion Score     | C.I. %        |
| 941.6141                                 | 941.6689  | IGIEIHKR          |                         |                      |               |               |
| 960.5109                                 | 960.5648  | VTDALNATR         |                         |                      |               |               |
| 961.4849                                 | 961.5546  | APGFGDNRK         |                         |                      |               |               |
| 1011.5693                                | 1011.6306 | GANPVEIRR         |                         |                      |               |               |
| 1215.658                                 | 1215.7274 | NAGVEGSLIVEK      |                         |                      |               |               |
| 1344.7158                                | 1344.7906 | TVIIEQSWGSPK      |                         |                      |               |               |
| 1389.705                                 | 1389.7827 | GYISPYFINTSK      |                         |                      |               |               |
| 1601.7516                                | 1601.8445 | CEFQDAYVLLSEK     | Carbamidomethyl (C)[1]  |                      |               |               |
| 1630.9084                                | 1630.9923 | VGEVIVTKDDAMLLK   |                         |                      |               |               |
| 1646.9033                                | 1646.9806 | VGEVIVTKDDAMLLK   | Oxidation (M)[12]       |                      |               |               |
| 1684.905                                 | 1684.9977 | AAVEEGIVLGGGCALLR | Carbamidomethyl (C)[13] | 142                  | 100           |               |
| 1684.905                                 | 1684.9977 | AAVEEGIVLGGGCALLR | Carbamidomethyl (C)[13] |                      |               |               |
| 1729.8466                                | 1729.957  | CEFQDAYVLLSEKK    | Carbamidomethyl (C)[1]  |                      |               |               |
| 1771.8531                                | 1771.9607 | CIPALDSLTPANEDQK  | Carbamidomethyl (C)[1]  |                      |               |               |
| 1914.9265                                | 1915.0348 | GQKCEFQDAYVLLSEK  | Carbamidomethyl (C)[4]  |                      |               |               |

**Supplementary Table 3.** Peptide mass fingerprints of purified ATP5B.

| Protein Name                                                                     |           | Accession No.         | Protein Score        | Protein Score C.I. % | Protein MW/Da | Peptide Count |
|----------------------------------------------------------------------------------|-----------|-----------------------|----------------------|----------------------|---------------|---------------|
| Mitochondrial ATP synthase, H <sup>+</sup> transporting F1, complex beta subunit |           | gi 89574029           | 378                  | 100                  | 56524.6       | 18            |
| Calc. Mass                                                                       | Obs. Mass | Peptide Seq.          | Modification         |                      | Ion Score     | C.I. %        |
| 975.5621                                                                         | 975.6116  | IGLFGGAGVGK           |                      |                      |               |               |
| 1038.5942                                                                        | 1038.6519 | IPVGPETLGR            |                      |                      |               |               |
| 1088.635                                                                         | 1088.6943 | VVDLLAPYAK            |                      |                      |               |               |
| 1191.6732                                                                        | 1191.6135 | GVQKILQDYK            |                      |                      |               |               |
| 1262.6409                                                                        | 1262.7043 | TIAMDGTEGLVR          |                      |                      |               |               |
| 1278.6359                                                                        | 1278.6975 | TIAMDGTEGLVR          | Oxidation (M)[4]     |                      |               |               |
| 1385.7094                                                                        | 1385.7805 | IMNVIGEPIDER          | Oxidation (M)[2]     |                      |               |               |
| 1406.681                                                                         | 1406.7484 | AHGGYSVFAGVGER        |                      |                      | 112           | 100           |
| 1435.7539                                                                        | 1435.8184 | FTQAGSEVSALLGR        |                      |                      |               |               |
| 1439.7893                                                                        | 1439.8538 | VALTGLTVAEYFR         |                      |                      | 66            | 99.9          |
| 1601.8104                                                                        | 1601.8896 | VALVYGQMNEPPGAR       | Oxidation (M)[8]     |                      | 15            | 0             |
| 1650.9174                                                                        | 1650.9904 | LVLEVAQHLGESTVR       |                      |                      | 129           | 100           |
| 1780.9625                                                                        | 1781.0431 | IMNVIGEPIDERGPIK      | Oxidation (M)[2]     |                      |               |               |
| 1831.8644                                                                        | 1831.9504 | IMDPNIVGSEHYDVAR      | Oxidation (M)[2]     |                      |               |               |
| 1919.0959                                                                        | 1919.1842 | VLDSGAPIKIPVGPETLG    |                      |                      | 155           | 100           |
| 1988.0334                                                                        | 1988.1268 | AIAELGIYPAVDPLDSTSR   |                      |                      |               |               |
| 2023.0106                                                                        | 2023.1111 | FLSQPFQVAEVFTGHMFG    |                      |                      |               |               |
| 2037.1086                                                                        | 2037.2023 | ETRLVLEVAQHLGESTVR    |                      |                      |               |               |
| 2039.0055                                                                        | 2039.1202 | FLSQPFQVAEVFTGHMGK    | Oxidation (M)[16]    |                      |               |               |
| 2266.0842                                                                        | 2266.1968 | IPSAVGYQPTLATDMGT MQR |                      |                      |               |               |
| 2282.0791                                                                        | 2282.1987 | IPSAVGYQPTLATDMGT MQR |                      |                      |               |               |
| 2298.074                                                                         | 2298.1912 | IPSAVGYQPTLATDMGT MQR | Oxidation (M)[15,18] |                      |               |               |

**Supplementary Table 4.** Peptide mass fingerprints of purified ATP5L.

| Protein Name                     |           | Accession No.   | Protein Score | Protein Score C.I. % | Protein MW/Da | Peptide Count |
|----------------------------------|-----------|-----------------|---------------|----------------------|---------------|---------------|
| F1F0-type ATP synthase subunit g |           | gi 3659901      | 80            | 99.98                | 11379.2       | 4             |
| Calc. Mass                       | Obs. Mass | Peptide Seq.    | Modification  |                      | Ion Score     | C.I. %        |
| 1151.6055                        | 1151.6708 | IVNSAQTGSFK     |               |                      |               |               |
| 1162.5931                        | 1162.6604 | LATFWYYAK       |               |                      |               |               |
| 1320.7092                        | 1320.6637 | MGQFVRNLVEK     |               |                      |               |               |
| 1587.8854                        | 1587.9659 | TPALVNAAVTYSKPR |               |                      | 26            | 11.078        |
| 1587.8854                        | 1587.9659 | TPALVNAAVTYSKPR |               |                      |               |               |

**Supplementary Table 5.** Summary of CETSA results.

| Protein name | T <sub>agg</sub> (°C) | T <sub>agg</sub> (°C) | $\Delta$ T <sub>agg</sub> (°C) |
|--------------|-----------------------|-----------------------|--------------------------------|
|              | Ctrl                  | Cr <sup>3+</sup>      |                                |
| ATP5L        | 52.9                  | 52.0                  | 0.9                            |
| ATP5B        | 55.5                  | 53.2                  | 2.3                            |
| Hsp60        | 57.2                  | 55.9                  | 1.3                            |
| CLIC1        | 65.3                  | 61.4                  | 3.9                            |
| PRDX1        | 63.2                  | 60.5                  | 2.7                            |
| TXN          | 64.1                  | 60.8                  | 3.3                            |
| COMT         | 56.9                  | 51.7                  | 5.2                            |
| H3F3A        | 59.3                  | 53.8                  | 5.5                            |
